# Supplementary material for: Drosulfakinin signaling in fruitless circuitry antagonizes P1 neurons to regulate sexual arousal in Drosophila
Source: PubMed Central journal article supplement (PMC6800437; doi:10.1038/s41467-019-12758-6), 2019-10-18
Supplement: 41467_2019_12758_MOESM1_ESM.pdf [file 41467_2019_12758_MOESM1_ESM.pdf]

**Drosulfakinin signaling in *fruitless* circuitry antagonizes P1 neurons to regulate sexual arousal in *Drosophila***

Wu et al.

**Supplementary Information**

## Supplementary Figures and Legends

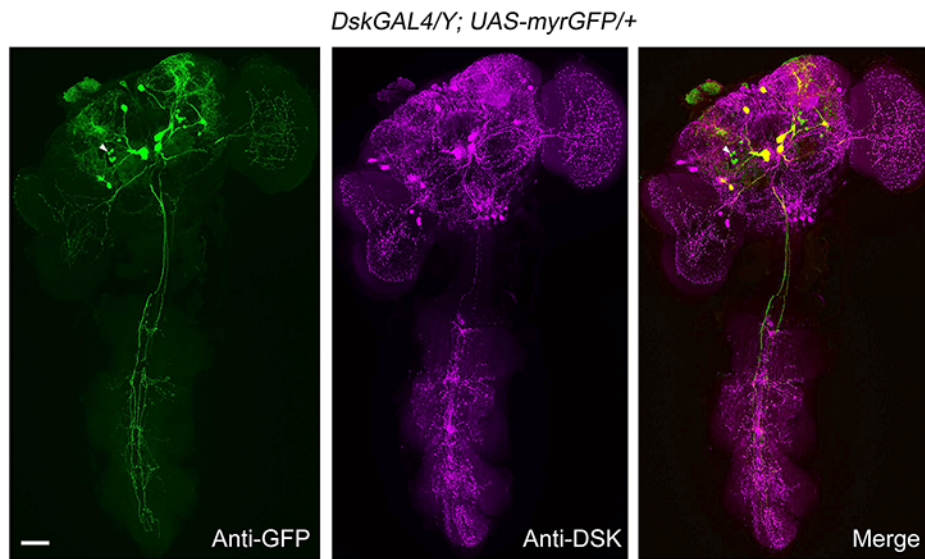

**Supplementary Fig. 1** Expression pattern of the *DskGAL4* (X chromosome) in the central nervous system. This GAL4 line was only used during behavioral screen (Fig. 1b). Arrowhead indicates non-*Dsk* neurons labeled by this *DskGAL4*. Scale bars, 50  $\mu\text{m}$ .

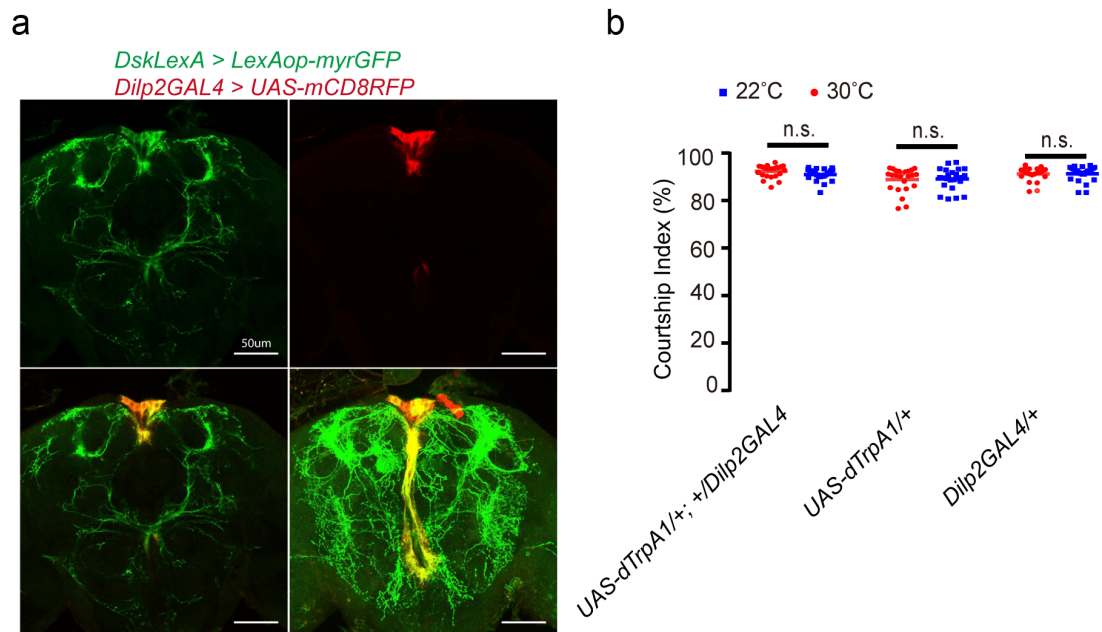

**Supplementary Fig. 2** *Dsk*-positive insulin-producing cells are not responsible for courtship inhibition. **a** Co-labeling of insulin-producing cells in the Pars

Intercerebralis (PI) region by *DskLexA* (green) and *Dilp2GAL4* (red). Representative of 5 male brains. Scale bars, 50  $\mu\text{m}$ . The bottom right panel indicates Z-projection of the full stack. **b** Activating *Dsk*-positive insulin-producing cells alone labeled by *dilp2GAL4* does not affect male courtship.  $n = 24$  for each.  $p < 0.001$ , Kruskal-Wallis test.  $p = 0.6481$ ,  $p > 0.9999$ ,  $p > 0.9999$  respectively, post hoc Dunn's multiple comparisons test. n.s., not significant. Error bars indicate SEM. Source data are provided as a Source Data file.

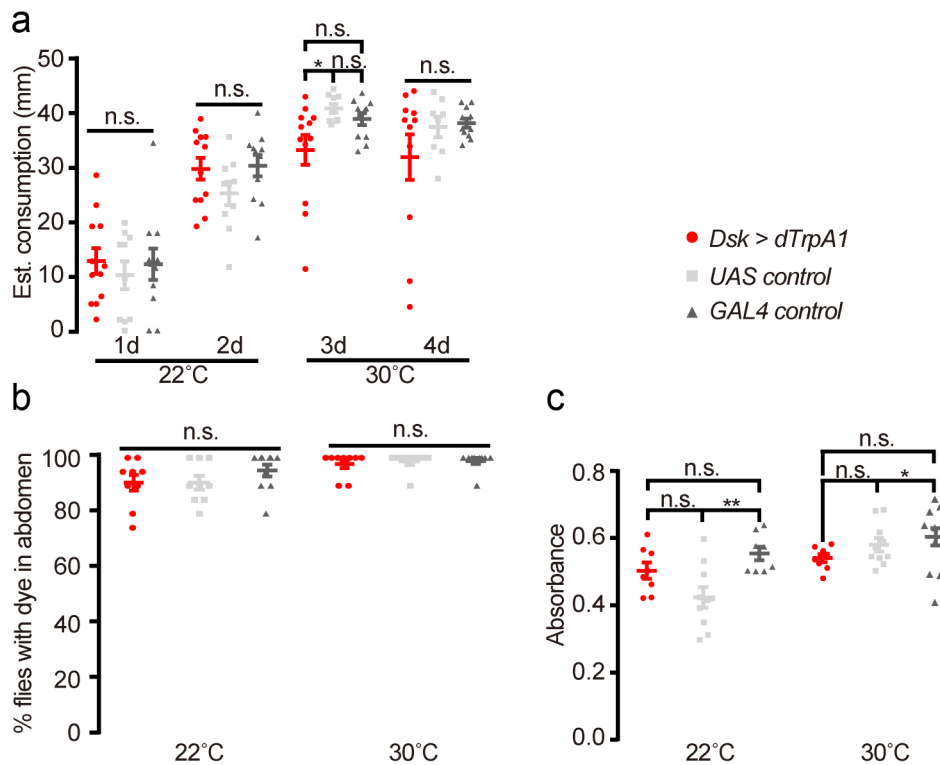

**Supplementary Fig. 3** Activating *DskGAL4* neurons does not affect feeding behavior.

**a** Activation of *Dsk* neurons in males has no effect on food intake as measured by CAFE assay for 4 consecutive days. Day 1:  $n = 12$ , 10 and 11,  $p = 0.7673$ , one-way ANOVA. Day 2:  $n = 12$ , 10 and 11,  $p = 0.1839$ , one-way ANOVA. Day 3:  $n = 12$ , 9 and 11,  $p = 0.0639$ , one-way ANOVA. Day 4:  $n = 11$ , 8 and 11,  $p = 0.2382$ , one-way ANOVA. **b** Ingested food with blue dye was visually counted in the abdomen of

starved male flies after 15-min feeding. 22°C:  $n = 9$ , 9 and 10,  $p = 0.2880$ , Kruskal-Wallis test. 30°C:  $n = 9$ , 8 and 9,  $p = 0.7861$ , Kruskal-Wallis test. Each sample contains 20 males. **c** The absorbance of ingested colored food was measured in starved male flies after 15-min feeding. 22°C:  $n = 8$ , 10 and 8,  $p = 0.0054$ , one-way ANOVA,  $**p = 0.0045$ ,  $p = 0.0955$  and  $0.4008$  (n.s.) respectively, post hoc Tukey's multiple comparisons test. 30°C:  $n = 8$ , 10 and 10,  $p = 0.0346$ , one-way ANOVA,  $*p = 0.0266$ ,  $p = 0.4051$  and  $0.4007$  (n.s.) respectively, post hoc Tukey's multiple comparisons test. Each sample contains 20 males. n.s., not significant. Error bars indicate SEM. Source data are provided as a Source Data file.

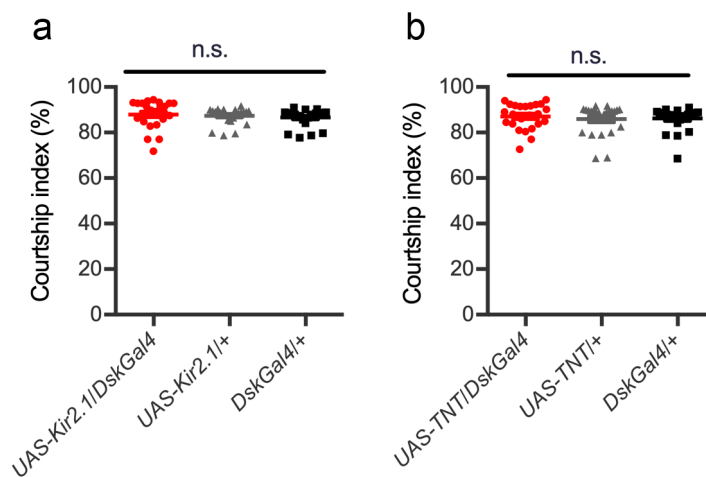

**Supplementary Fig. 4** Inhibiting *DskGAL4* neurons does not affect male courtship. **a**, **b** Blocking *DskGAL4* neuronal transmission using Kir2.1 (**a**) or tetanus toxin (TNT) (**b**) does not affect male courtship to wild-type virgin females.  $n = 24$  for each. For Kir2.1:  $p = 0.1650$ , Kruskal-Wallis test. For TNT:  $p = 0.3673$ , Kruskal-Wallis test. n.s., not significant. Error bars indicate SEM. Source data are provided as a Source Data file.



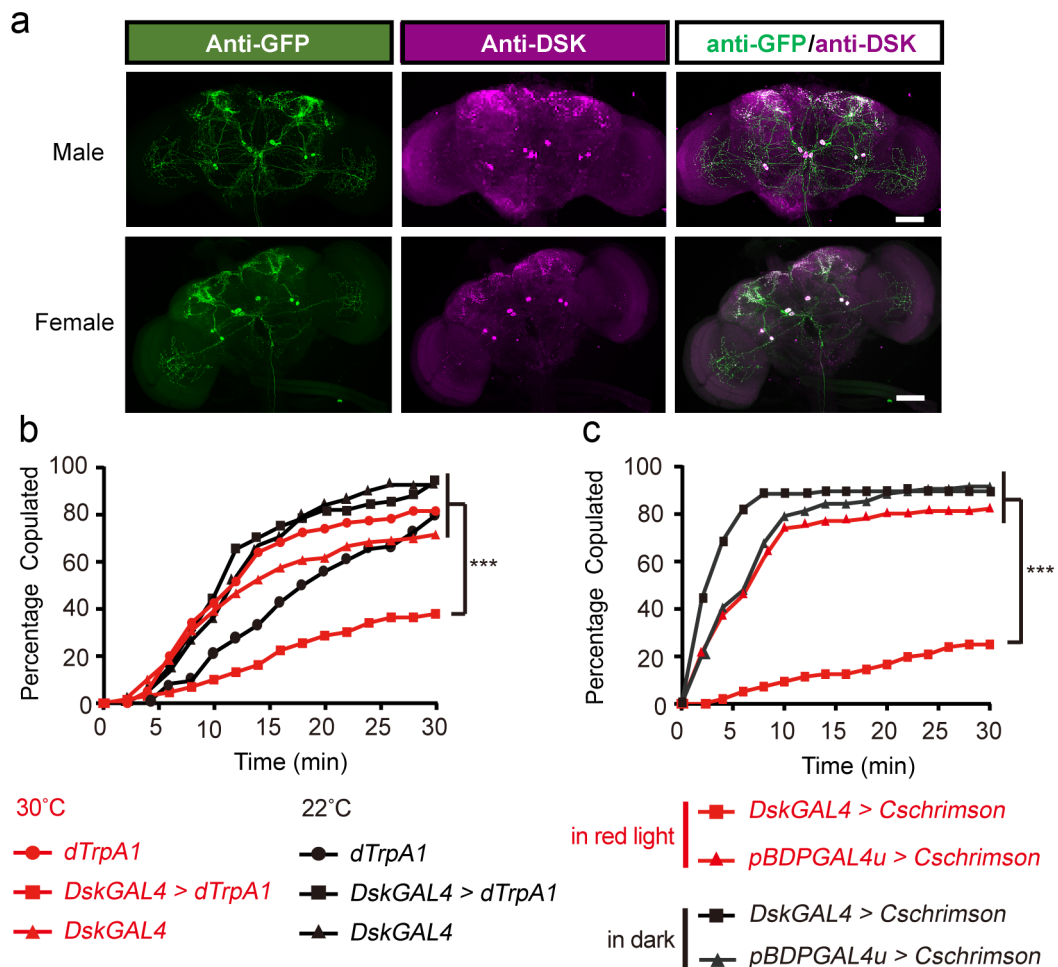

**Supplementary Fig. 5** *Dsk* neurons are sexually monomorphic and inhibit male and female sexual behaviors. **a** There is no obvious *Dsk* expression difference between male and female. Representative of 8 males and 5 females. Two pairs of MP1 and two pairs of MP3 neurons are labeled in all samples. Scale bars, 50  $\mu$ m. **b** Thermogenic activation of *DskGAL4* neurons reduces female receptivity.  $n = 82\sim 120$  for each.  $***p < 0.001$ , chi-square test. **c** Optogenetic activation of *DskGAL4* neurons impairs female receptivity.  $n = 60\sim 84$  for each.  $***p < 0.001$ , chi-square test. Source data are provided as a Source Data file.

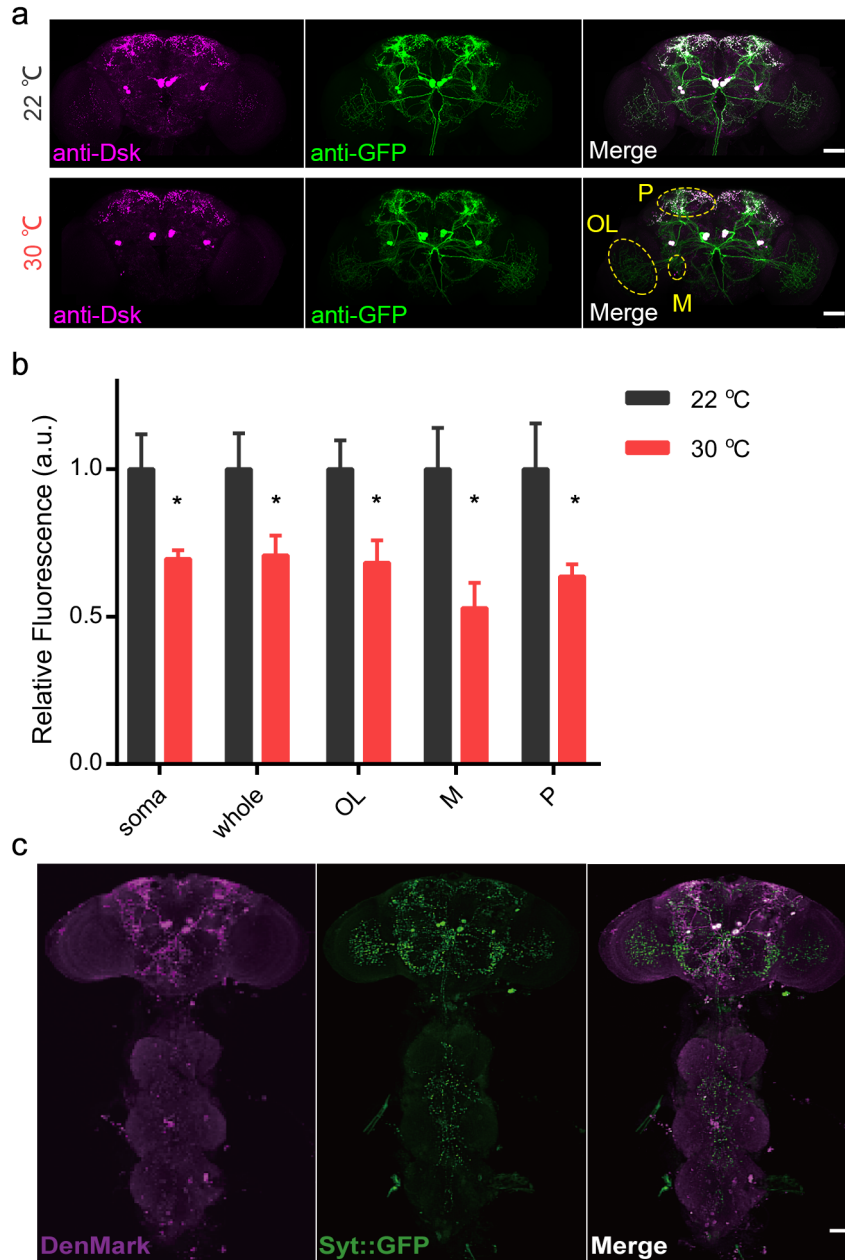

**Supplementary Fig. 6** Activating *Dsk* neurons induces secretion of DSK peptides. **a** Examples of co-staining of DSK and GFP in *Dsk* neurons with or without *dTrpA1* activation (30 min heat treatment at 30°C). **b** Activating *Dsk* neurons for 30 min reduces DSK retention in soma, optic lobes (OL, mainly presynaptic), median (M) and protocerebrum (P), possibly by secreting DSK.  $n = 7$  and 10 respectively for 22°C and 30°C.  $*p < 0.05$ , two-tailed unpaired  $t$  test. **c** Pre-synaptic and post-synaptic labeling of *Dsk* neurons by *syt::GFP* and Denmark, respectively. Representative of 4

male flies. Scale bars, 50  $\mu$ m. Source data are provided as a Source Data file.

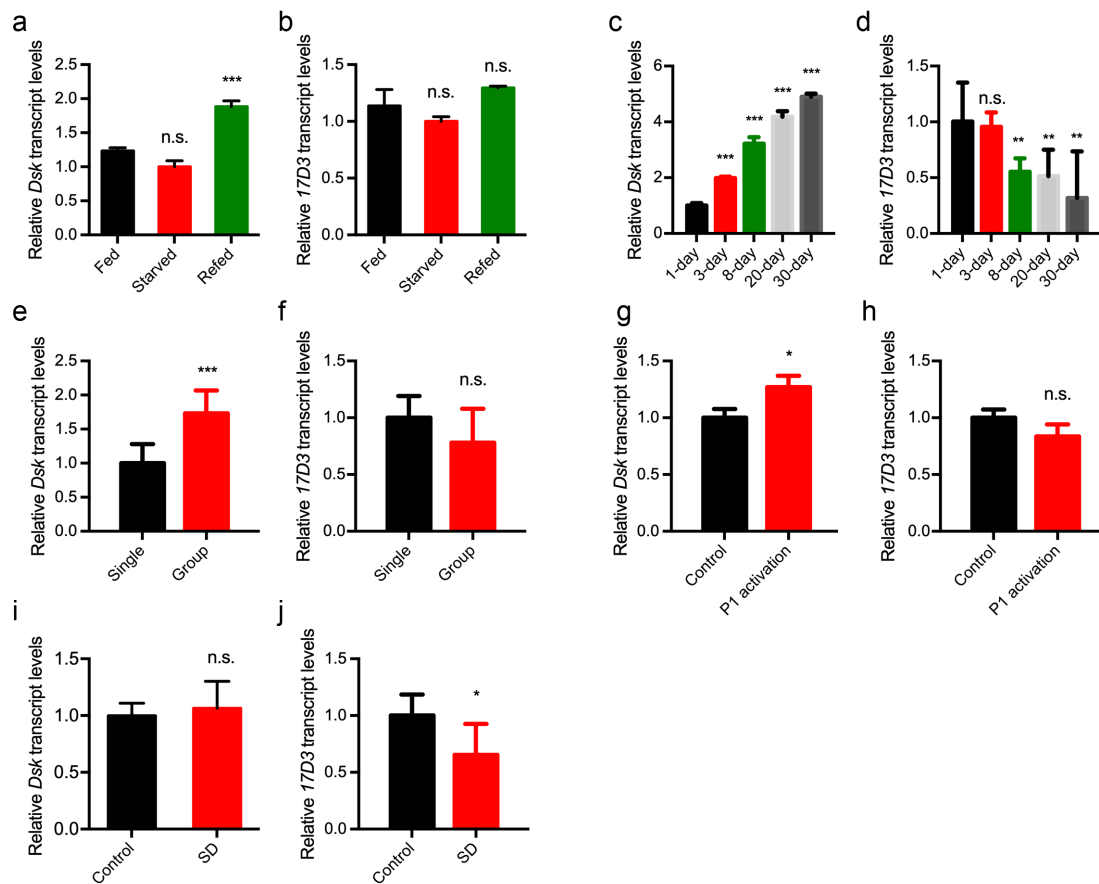

**Supplementary Fig. 7** *Dsk* and *CCKLR-17D3* expression responds to different physiological conditions. **a, b** Refed after starvation increases *Dsk* mRNA transcript but has no impact on *CCKLR-17D3* expression. **c, d** Aging increases *Dsk* mRNA transcript but decreases *CCKLR-17D3* expression. **e, f** Group housing increases *Dsk* mRNA transcript but has no impact on *CCKLR-17D3* expression. **g, h** Activation of P1 neurons increases *Dsk* mRNA transcript but has no impact on *CCKLR-17D3* expression. **i, j** Sleep-deprivation (SD) has no impact on *Dsk* mRNA transcript but decreases *CCKLR-17D3* expression.  $n = 10-12$  based on three replicates for each. For **a-d**, \*\*\* $p < 0.001$ , \*\* $p < 0.01$ , n.s., not significant by One-way ANOVA with post hoc Dunn's multiple comparisons test. For **e-j**, \*\*\* $p < 0.001$ , \* $p < 0.05$ , n.s., not significant by unpaired  $t$  test. Error bars indicate SEM. Source data are provided as a

Source Data file.

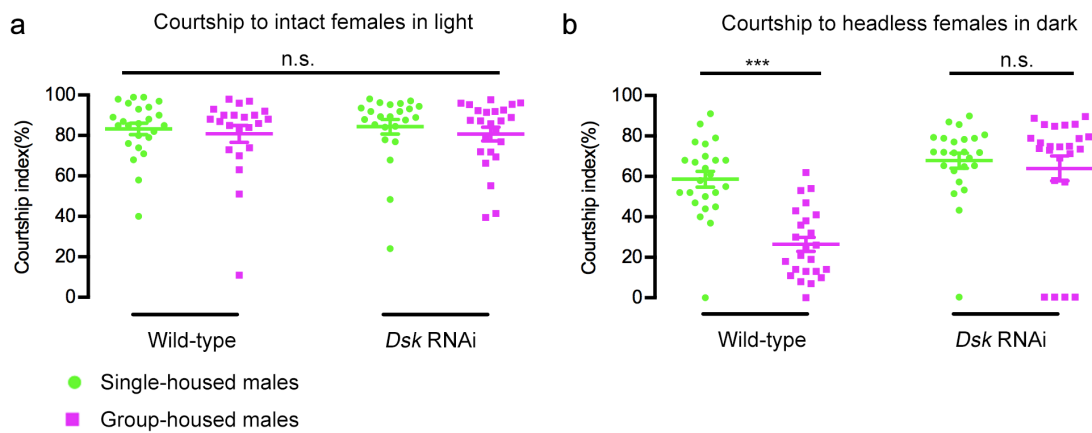

**Supplementary Fig. 8** Group-housing reduces male courtship in a DSK-dependent manner. **a** Courtship towards intact females in light are not affected by group-housing in either wild-type males or *R57C10-GAL4/UAS-DskRNAi* males.  $n = 20, 22, 23, 24$  respectively. **b** Group-housing reduces male courtship towards headless females in dark in wild-type males, while knock-down of *Dsk* expression eliminates such inhibitory effect.  $n = 24$  for each,  $***p < 0.001$ , n.s., not significant, One-way ANOVA with post hoc Dunn's multiple comparisons test. Error bars indicate SEM. Source data are provided as a Source Data file.

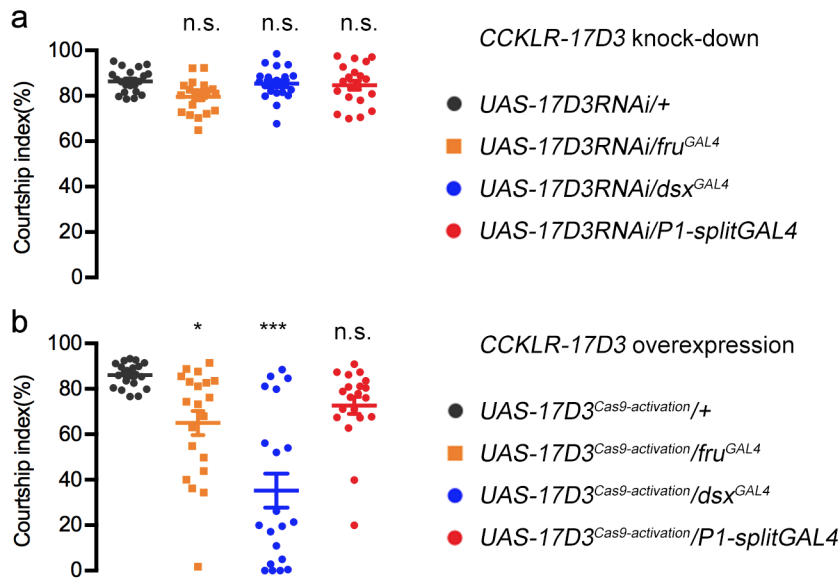

**Supplementary Fig. 9** *CCKLR-17D3* inhibits male courtship in many *fru<sup>M</sup>* and/or *dsx* neurons. **a** Knocking down *CCKLR-17D3* expression in all *fru<sup>M</sup>* neurons, all *dsx* neurons or a subset of P1 neurons does not affect male courtship. **b** Overexpression of *CCKLR-17D3* in all *fru<sup>M</sup>* neurons or all *dsx* neurons, but not a subset of P1 neurons alone, reduces male courtship.  $n = 20$  for each,  $*p < 0.05$ ,  $***p < 0.001$ , n.s., not significant, One-way ANOVA with post hoc Dunn's multiple comparisons test. Error bars indicate SEM. Source data are provided as a Source Data file.

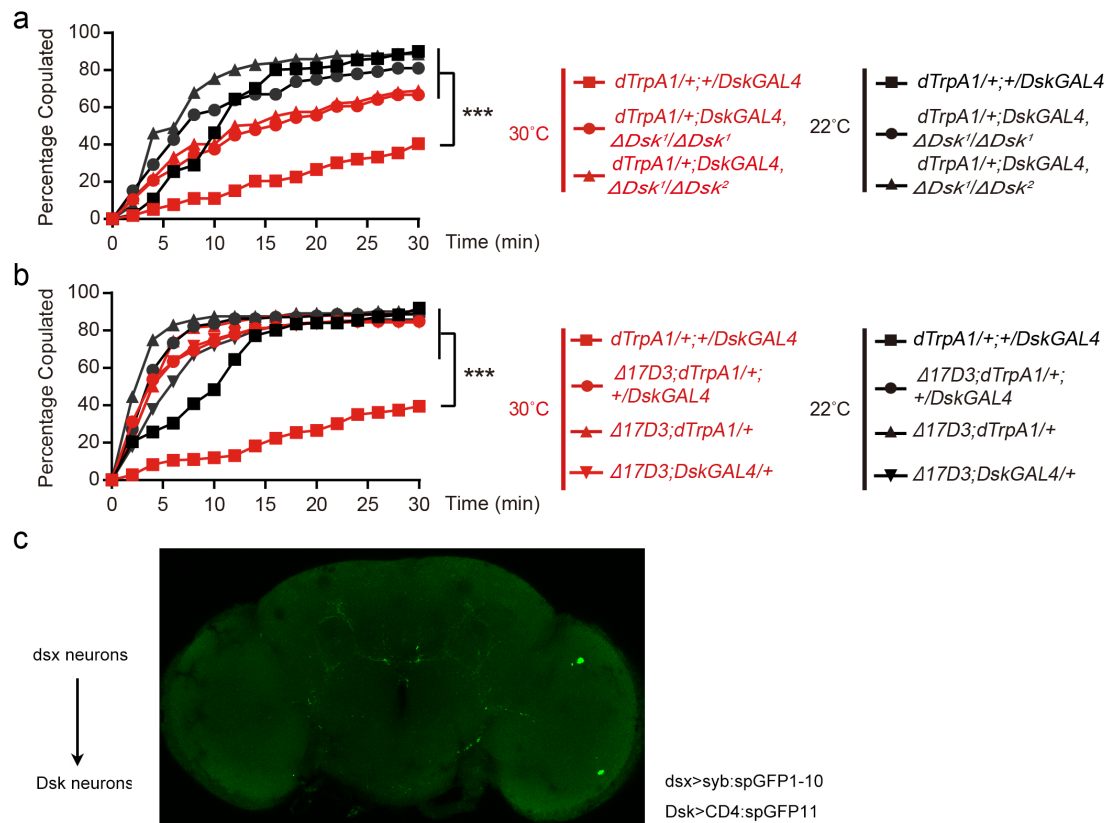

**Supplementary Fig. 10** DSK/CCKLR-17D3 signaling regulates female receptivity. **a** Inhibition of female receptivity by activating *DskGAL4* neurons depends on DSK peptides.  $n = 120-180$  for each. \*\*\* $p < 0.001$ , chi-square test. **b** Inhibition of female receptivity by activating *DskGAL4* neurons depends on CCKLR-17D3.  $n = 108-190$  for each. \*\*\* $p < 0.001$ , chi-square test. **c** Synaptic transmission from *dsx* neurons to *Dsk* neurons as revealed by syb-GRASP signals. Representative of 5 female brains. Source data are provided as a Source Data file.

**Supplementary Table 1.** Activation of *DskGAL4* neurons does not promote ejaculation in isolated males.

| Genotype                                  | Percentage of males ejaculate (total number) |           |
|-------------------------------------------|----------------------------------------------|-----------|
|                                           | 22°C                                         | 30°C      |
| <i>UAS-dTrpA1/+; DskGAL4/+</i>            | 0% (12)                                      | 0% (24)   |
| <i>UAS-dTrpA1/+; fru<sup>GAL4</sup>/+</i> | 0% (23)                                      | 100% (20) |
| <i>UAS-dTrpA1/+; CrzGAL4/+</i>            | 0% (21)                                      | 50% (28)  |
| <i>UAS-dTrpA1/CrzGAL4</i>                 | 0% (23)                                      | 75% (24)  |
